# Supplementary material
Source: HighWire-hosted journal article supplement (https://bmjopen.bmj.com/content/11/3/e047961)
Supplement: inline-supplementary-material-2 [file inline-supplementary-material-2.pdf]

Supplementary Table 1: Changes in mean daily admissions to Hlabisa hospital at each stage of lockdown: linear regression models adjusted for day of week

|                       | Pre-lockdown average daily admissions (95% CI) |       |       | Change at level 5 | 95% CI |       | P value | Change at level 4 | 95% CI |      | P value | Change at level 3 | 95% CI |      | P value | Change at level 2 | 95% CI |       | P value | Change at level 1 | 95% CI |       | P value |
|-----------------------|------------------------------------------------|-------|-------|-------------------|--------|-------|---------|-------------------|--------|------|---------|-------------------|--------|------|---------|-------------------|--------|-------|---------|-------------------|--------|-------|---------|
|                       |                                                |       |       |                   |        |       |         |                   |        |      |         |                   |        |      |         |                   |        |       |         |                   |        |       |         |
| All admissions        | 16.96                                          | 14.93 | 19.00 | -0.74             | -3.02  | 1.53  | 0.52    | -0.23             | -3.03  | 2.57 | 0.87    | 3.18              | 0.77   | 5.59 | 0.01    | 0.40              | -1.94  | 2.73  | 0.74    | -1.88             | -4.72  | 0.97  | 0.20    |
| Male >19              | 2.55                                           | 1.85  | 3.26  | -0.13             | -0.92  | 0.66  | 0.74    | -0.20             | -1.17  | 0.77 | 0.68    | 1.27              | 0.44   | 2.11 | <0.001  | -0.07             | -0.88  | 0.74  | 0.87    | -0.25             | -1.24  | 0.73  | 0.61    |
| Female >19            | 8.70                                           | 7.17  | 10.23 | 0.54              | -1.17  | 2.26  | 0.53    | 0.33              | -1.78  | 2.44 | 0.76    | 1.36              | -0.46  | 3.17 | 0.14    | 0.51              | -1.25  | 2.27  | 0.57    | -1.17             | -3.31  | 0.97  | 0.28    |
| Age <1                | 1.55                                           | 1.19  | 1.91  | -0.64             | -1.04  | -0.23 | <0.001  | -0.44             | -0.93  | 0.06 | 0.08    | 0.34              | -0.09  | 0.76 | 0.12    | -0.25             | -0.66  | 0.17  | 0.24    | 0.12              | -0.38  | 0.62  | 0.64    |
| Age 1-5               | 1.05                                           | 0.71  | 1.39  | -0.50             | -0.88  | -0.12 | 0.01    | -0.07             | -0.53  | 0.40 | 0.78    | 0.27              | -0.13  | 0.67 | 0.19    | -0.36             | -0.74  | 0.03  | 0.07    | 0.35              | -0.13  | 0.82  | 0.15    |
| Age 6-19              | 3.11                                           | 2.41  | 3.81  | -0.02             | -0.80  | 0.76  | 0.96    | 0.14              | -0.82  | 1.11 | 0.77    | -0.05             | -0.88  | 0.77 | 0.90    | 0.56              | -0.25  | 1.36  | 0.17    | -0.92             | -1.90  | 0.06  | 0.07    |
| Age 20-45             | 8.89                                           | 7.37  | 10.40 | 0.87              | -0.82  | 2.56  | 0.31    | -0.55             | -2.63  | 1.53 | 0.60    | 2.14              | 0.34   | 3.93 | 0.02    | 0.72              | -1.01  | 2.46  | 0.41    | -1.44             | -3.55  | 0.68  | 0.18    |
| Age 46-65             | 1.23                                           | 0.71  | 1.75  | -0.20             | -0.78  | 0.38  | 0.50    | 0.37              | -0.34  | 1.09 | 0.31    | 0.43              | -0.18  | 1.05 | 0.17    | -0.54             | -1.13  | 0.06  | 0.08    | 0.30              | -0.43  | 1.03  | 0.42    |
| Age >65               | 1.14                                           | 0.70  | 1.57  | -0.26             | -0.74  | 0.23  | 0.30    | 0.31              | -0.29  | 0.90 | 0.31    | 0.06              | -0.46  | 0.57 | 0.83    | 0.26              | -0.24  | 0.75  | 0.31    | -0.29             | -0.90  | 0.31  | 0.35    |
| Maternal and neonatal | 8.10                                           | 6.61  | 9.60  | 0.90              | -0.77  | 2.57  | 0.29    | 0.47              | -1.58  | 2.53 | 0.65    | 0.31              | -1.46  | 2.08 | 0.73    | 0.99              | -0.72  | 2.70  | 0.26    | -3.33             | -5.41  | -1.24 | 0.002   |
| NCDs                  | 3.84                                           | 2.96  | 4.72  | -0.48             | -1.47  | 0.50  | 0.34    | 0.65              | -0.56  | 1.87 | 0.29    | 0.37              | -0.67  | 1.41 | 0.49    | -0.53             | -1.54  | 0.48  | 0.30    | -1.23             | -2.46  | 0.001 | 0.05    |
| CDs                   | 6.49                                           | 5.38  | 7.60  | -0.94             | -2.18  | 0.30  | 0.14    | -0.32             | -1.84  | 1.21 | 0.68    | 0.97              | -0.34  | 2.29 | 0.15    | -0.73             | -2.00  | 0.55  | 0.26    | -1.04             | -2.59  | 0.51  | 0.19    |
| Injuries              | 2.47                                           | 1.98  | 2.96  | -0.41             | -0.96  | 0.14  | 0.15    | -0.27             | -0.94  | 0.41 | 0.44    | 0.46              | -0.13  | 1.04 | 0.13    | -0.22             | -0.78  | 0.35  | 0.45    | -0.74             | -1.43  | 0.06  | 0.03    |
| Respiratory           | 0.73                                           | 0.35  | 1.10  | -0.49             | -0.91  | -0.08 | 0.02    | -0.26             | -0.77  | 0.25 | 0.32    | 1.27              | 0.83   | 1.71 | <0.001  | -0.70             | -1.12  | -0.27 | 0.002   | -0.11             | -0.63  | 0.41  | 0.68    |

NCDs: non-communicable disease

CDs: communicable diseases

CI: confidence interval

**Supplementary Table 2: Time trends and step changes in daily hospital admissions before and after start of level 5 lockdown: Poisson regression models adjusted for day of week**

|                       | Pre-lockdown daily incidence rate | 95% Confidence Interval |       | IRR pre-lockdown (per week) | 95% Confidence Interval |        | P value | IRR at lockdown | Confidence Interval |      | P value | IRR post-lockdown (per week) | 95% Confidence Interval |       | P value | P value of interaction term |
|-----------------------|-----------------------------------|-------------------------|-------|-----------------------------|-------------------------|--------|---------|-----------------|---------------------|------|---------|------------------------------|-------------------------|-------|---------|-----------------------------|
| All admissions        | 16.06                             | 14.30                   | 18.03 | 0.990                       | 0.977                   | 1.003  | 0.14    | 1.06            | 0.95                | 1.19 | 0.31    | 1.004                        | 1.000                   | 1.007 | 0.04    | 0.05                        |
| Male >19              | 1.71                              | 1.24                    | 2.36  | 0.94                        | 0.91                    | 0.97   | <0.001  | 1.50            | 1.10                | 2.06 | 0.01    | 1.011                        | 1.002                   | 1.020 | 0.01    | <0.001                      |
| Female>19             | 9.23                              | 7.92                    | 10.76 | 1.01                        | 0.99                    | 1.02   | 0.57    | 1.05            | 0.91                | 1.21 | 0.51    | 1.004                        | 1.000                   | 1.009 | 0.06    | 0.92                        |
| Age <1                | 1.12                              | 0.71                    | 1.75  | 0.96                        | 0.92                    | 1.004  | 0.08    | 0.74            | 0.48                | 1.16 | 0.19    | 0.99                         | 0.98                    | 1.01  | 0.45    | 0.16                        |
| Age 1-5               | 0.69                              | 0.40                    | 1.19  | 0.94                        | 0.89                    | 0.998  | 0.04    | 0.88            | 0.51                | 1.52 | 0.65    | 1.00                         | 0.98                    | 1.02  | 0.85    | 0.05                        |
| Age 6-19              | 3.50                              | 2.65                    | 4.62  | 1.02                        | 0.99                    | 1.05   | 0.26    | 0.96            | 0.73                | 1.26 | 0.76    | 1.00                         | 0.99                    | 1.01  | 0.53    | 0.21                        |
| Age 20-45             | 9.17                              | 7.86                    | 10.69 | 1.00                        | 0.98                    | 1.02   | 0.91    | 1.08            | 0.93                | 1.25 | 0.29    | 1.005                        | 1.0003                  | 1.01  | 0.04    | 0.69                        |
| Age 46-65             | 1.01                              | 0.67                    | 1.52  | 0.96                        | 0.92                    | 1.01   | 0.10    | 1.34            | 0.91                | 1.96 | 0.14    | 1.006                        | 0.995                   | 1.018 | 0.26    | 0.06                        |
| Age >65               | 0.82                              | 0.51                    | 1.32  | 0.95                        | 0.90                    | 1.0003 | 0.05    | 1.23            | 0.77                | 1.96 | 0.39    | 1.012                        | 0.998                   | 1.026 | 0.08    | 0.02                        |
| Maternal and neonatal | 9.67                              | 8.27                    | 11.30 | 1.03                        | 1.01                    | 1.05   | 0.01    | 1.01            | 0.87                | 1.18 | 0.86    | 0.997                        | 0.992                   | 1.002 | 0.21    | 0.003                       |
| NCDs                  | 3.27                              | 2.57                    | 4.18  | 0.97                        | 0.95                    | 1.001  | 0.06    | 1.26            | 0.998               | 1.58 | 0.05    | 0.995                        | 0.988                   | 1.002 | 0.19    | 0.14                        |
| CDs                   | 5.52                              | 4.55                    | 6.00  | 0.98                        | 0.96                    | 0.998  | 0.04    | 1.07            | 0.89                | 1.28 | 0.47    | 0.997                        | 0.991                   | 1.003 | 0.29    | 0.08                        |
| Injuries              | 1.83                              | 1.26                    | 2.00  | 0.95                        | 0.91                    | 0.99   | 0.02    | 1.29            | 0.88                | 1.89 | 0.19    | 0.986                        | 0.974                   | 0.999 | 0.04    | 0.09                        |
| Respiratory           | 0.40                              | 0.23                    | 0.71  | 0.92                        | 0.87                    | 0.97   | 0.004   | 1.25            | 0.73                | 2.12 | 0.41    | 1.02                         | 1.002                   | 1.03  | 0.03    | 0.001                       |

NCDs: non-communicable disease

CDs: communicable diseases

**Supplementary Table 3. Time trends and step changes in daily hospital admissions before and after start of level 5 lockdown: linear regression models adjusted for day of week**

|                           | Average admissions day before lockdown | 95% Confidence Interval |       | Change in daily admissions/week pre-lockdown | 95% Confidence Interval |       | P value | Change in daily admissions at lockdown | 95% Confidence Interval |      | P value | Change in daily admissions/week post-lockdown | 95% Confidence Interval |       | P value | P value of interaction term |
|---------------------------|----------------------------------------|-------------------------|-------|----------------------------------------------|-------------------------|-------|---------|----------------------------------------|-------------------------|------|---------|-----------------------------------------------|-------------------------|-------|---------|-----------------------------|
|                           |                                        |                         |       |                                              |                         |       |         |                                        |                         |      |         |                                               |                         |       |         |                             |
| All admissions            | 15.71                                  | 12.75                   | 18.66 | -0.20                                        | -0.55                   | 0.15  | 0.26    | 1.17                                   | -1.76                   | 4.10 | 0.43    | 0.08                                          | -0.02                   | 0.17  | 0.10    | 0.13                        |
| Male >19                  | 1.42                                   | 0.42                    | 2.43  | -0.18                                        | -0.30                   | -0.06 | 0.003   | 1.08                                   | 0.08                    | 2.08 | 0.03    | 0.04                                          | 0.00                    | 0.07  | 0.02    | 0.001                       |
| Female>19                 | 9.03                                   | 6.82                    | 11.24 | 0.06                                         | -0.20                   | 0.32  | 0.67    | 0.58                                   | -1.61                   | 2.77 | 0.60    | 0.05                                          | -0.02                   | 0.12  | 0.13    | 0.99                        |
| Age <1                    | 1.11                                   | 0.60                    | 1.63  | -0.07                                        | -0.13                   | -0.01 | 0.02    | -0.31                                  | -0.82                   | 0.20 | 0.23    | -0.01                                         | -0.02                   | 0.01  | 0.48    | 0.04                        |
| Age 1-5                   | 0.64                                   | 0.16                    | 1.13  | -0.07                                        | -0.12                   | -0.01 | 0.02    | -0.05                                  | -0.53                   | 0.43 | 0.85    | 0.001                                         | -0.01                   | 0.02  | 0.87    | 0.03                        |
| Age 6-19                  | 3.49                                   | 2.49                    | 4.50  | 0.06                                         | -0.06                   | 0.18  | 0.31    | -0.14                                  | -1.13                   | 0.86 | 0.79    | -0.01                                         | -0.04                   | 0.02  | 0.57    | 0.26                        |
| Age 20-45                 | 8.92                                   | 6.73                    | 11.11 | 0.01                                         | -0.25                   | 0.27  | 0.95    | 0.92                                   | -1.26                   | 3.09 | 0.41    | 0.06                                          | -0.01                   | 0.13  | 0.08    | 0.70                        |
| Age 46-65                 | 0.82                                   | 0.06                    | 1.57  | -0.07                                        | -0.16                   | 0.02  | 0.13    | 0.50                                   | -0.24                   | 1.24 | 0.19    | 0.01                                          | -0.01                   | 0.04  | 0.28    | 0.08                        |
| Age >65                   | 0.72                                   | 0.10                    | 1.34  | -0.07                                        | -0.14                   | 0.00  | 0.07    | 0.24                                   | -0.37                   | 0.85 | 0.44    | 0.02                                          | 0.00                    | 0.04  | 0.09    | 0.03                        |
| Maternal and neonatal     | 9.74                                   | 7.58                    | 11.89 | 0.27                                         | 0.01                    | 0.52  | 0.04    | 0.23                                   | -1.91                   | 2.36 | 0.83    | -0.03                                         | -0.10                   | 0.03  | 0.32    | 0.03                        |
| Non-communicable diseases | 3.07                                   | 1.79                    | 4.34  | -0.13                                        | -0.28                   | 0.02  | 0.09    | 1.11                                   | -0.15                   | 2.38 | 0.08    | -0.02                                         | -0.06                   | 0.02  | 0.24    | 0.19                        |
| Communicable diseases     | 5.38                                   | 3.78                    | 6.97  | -0.18                                        | -0.37                   | 0.01  | 0.06    | 0.54                                   | -1.04                   | 2.12 | 0.50    | -0.02                                         | -0.07                   | 0.03  | 0.37    | 0.11                        |
| Injuries                  | 1.83                                   | 1.13                    | 2.54  | -0.11                                        | -0.19                   | -0.02 | 0.01    | 0.46                                   | -0.24                   | 1.16 | 0.20    | -0.02                                         | -0.04                   | 0.001 | 0.06    | 0.06                        |
| Respiratory               | 0.14                                   | -0.42                   | 0.71  | -0.09                                        | -0.16                   | -0.03 | 0.01    | 0.23                                   | -0.32                   | 0.79 | 0.41    | 0.02                                          | 0.000                   | 0.036 | 0.04    | 0.001                       |

**Supplementary Table 4: Risk of death among admissions: logistic regression models with and without adjustment for sex, age category and diagnosis.\***

|                                              | Odds ratio | 95% Confidence Interval |       | P value |
|----------------------------------------------|------------|-------------------------|-------|---------|
| <b>Model 1, not adjusted for case mix</b>    |            |                         |       |         |
| Weekly change in risk of death pre-lockdown  | 1.03       | 0.97                    | 1.09  | 0.37    |
| Step change in risk of death at lockdown     | 0.49       | 0.29                    | 0.82  | 0.01    |
| Weekly change in risk of death post-lockdown | 1.03       | 1.01                    | 1.04  | 0.002*  |
| <b>Model 2, adjusted for case mix</b>        |            |                         |       |         |
| Weekly change in risk of death pre-lockdown  | 1.10       | 1.02                    | 1.18  | 0.01    |
| Step change in risk of death at lockdown     | 0.31       | 0.17                    | 0.56  | <0.001  |
| Weekly change in risk of death post-lockdown | 1.03       | 1.01                    | 1.05  | 0.001*  |
| Female                                       | 0.73       | 0.56                    | 0.94  | 0.02    |
| Age                                          | 1.02       | 1.02                    | 1.03  | <0.001  |
| Communicable disease                         | 2.33       | 1.46                    | 3.71  | <0.001  |
| Neoplasm                                     | 3.32       | 1.52                    | 7.26  | 0.003   |
| Blood disorder                               | 1.96       | 1.01                    | 3.83  | 0.05    |
| Endocrine                                    | 0.95       | 0.48                    | 1.90  | 0.89    |
| Mental health                                | 0.41       | 0.13                    | 1.35  | 0.14    |
| Neurological                                 | 2.33       | 0.99                    | 5.49  | 0.05    |
| Otological                                   | 2.59       | 0.33                    | 20.63 | 0.37    |
| Circulatory                                  | 3.11       | 1.84                    | 5.24  | <0.001  |
| Respiratory                                  | 2.47       | 1.49                    | 4.08  | <0.001  |
| Gastroenterology                             | 2.75       | 1.42                    | 5.31  | 0.003   |
| Dermatology                                  | 0.73       | 0.30                    | 1.80  | 0.49    |
| Musculoskeletal                              | 0.49       | 0.07                    | 3.62  | 0.49    |
| Renal and urology                            | 1.48       | 0.78                    | 2.82  | 0.23    |
| Breast and gynaecology                       | 0.27       | 0.04                    | 2.06  | 0.21    |
| Maternal                                     | 1.00       | 0.00                    | 0.00  | <0.001  |
| Neonatal                                     | 2.31       | 1.15                    | 4.66  | 0.02    |
| Injuries                                     | 0.31       | 0.09                    | 1.04  | 0.06    |

\* Lockdown-time interaction: P=0.325 for model 1 and P=0.126 for model 2
